# Supplementary material
Source: PubMed Central journal article supplement (PMC31832)
Supplement: pnas_98_8_4317__2.pdf [file pnas_98_8_4317__2.pdf]

A

[ ] HAE III  
 L00635 ACCCCATAAACAATAAGGTTGGTCTAGCCTTCTATTAGCTCTTAGTAAGATTACACATGCAAGCATCCCC H00708  
 .....  
 .....  
 .....  
 .....  
 .....  
 .....  
 .....  
 T.....  
 .....G.....

[ ] HINC II  
 L13257 AGTCAACTAGGACTCATAATAGTTACAATCGGCATCAACCAACCACACCTAGCATTCCCTGCACATCTGTACCCACGCCTTCTCAAAGCCATACTATTTATGTGCTCCGGGTCCATCAT H13377  
 .....TG.....  
 .....G.....T.....  
 .....G.....C.....  
 .....G.....G.....T.....  
 .....G.....  
 .....G.....C.....  
 .....G.....  
 .....G.....  
 .....G.....

ALU I [ ]  
 L05054 TACAACCCTAACATAACCAATTCTTAATTAACTATTATATTATCCTAACTACTACCGCATTCCTACTCAACTTAACTCCAGCACCAGACCCTACTACTATCTCGCACCTGAAACAAGCTAACATGACT H05189  
 .....  
 .....  
 .....  
 .....G.....  
 .....W.....  
 .....R.....

B

223 298  
 L16209 CCCCATGCTTACAAGCAAGTACAGCAATCAACCCTCAACTATCACACATCAACTGCAACTCCAAAGCCACCCCTCACCCTAGGATACCAACAACCTACCCACCTTAACAGTACATAGTACATAAAGCCA H16303  
 .....T.....C.....  
 .....T.....C.....  
 T.....T.....T.....C.....  
 .....T.....T.....C.....  
 T.....T.....T.....C.....  
 .....T.....C.....  
 T.....T.....C.....  
 .....T.....C.....

325 327 357  
 L16287 CACTAGGATACCAACAACCTACCCACCTTAACAGTACATAGTACATAAAGCCATTACCGTACATAGCATTAGTCAAATCCCTTCTCGTCCCATGGATGACCCCTCAGATAGGGGTCCTTG H16379  
 .....C.T.....C.....  
 .....C.....C.T.....C.....  
 .....C.....C.T.....C.....  
 .....C.....C.T.....C.....  
 .....C.....C.T.....C.....  
 .....C.....T.....C.T.....CC.....  
 .....c.c.c.....C.T.....C.....  
 .....c.c.c.....C.T.....C.....  
 .....C.....T.....C.T.....C.....  
 | .....C.....C.T.....C.....  
 | .....C.....C.T.....C.....  
 2nd extract [ .....C.....T.....T.T.TWY.....C.....  
 | .....C.....C.T.....C.....C.....  
 | .....C.....C.T.....C.....
