# Supplementary material
Source: PubMed Central journal article supplement (PMC31832)
Supplement: pnas_98_8_4317__4.pdf [file pnas_98_8_4317__4.pdf]

A

L00635 ACCCCATAAACAAATAGGTTTGGTCCTAGCCTTTCTATTAGCTCTTAGTAAGATTACACATGCAAGCATCCCC H00708 [ ] HAE III

L13257 AGTCAACTAGGACTCATAATAGTTACAATCGGCATCAACCAACCACACTAGCATTCTGCACATCTGTACCCACGCCTTCTCAAAGCCATACTATTATGTGCTCCGGTCCATCAT H13377 [ ] HINC II

.....G.....  
 .....G.....  
 .....G.....  
 .....G.....R.....N.....K.....K.....A.....T.....  
 .....G.....R.....A.....R.....C.....  
 .....G.....A.....R.....A.....  
 .....T.....G.....A.....  
 .....T.....G.....T.....

L05054 TACAACCTAACATAACCATTCTTAATTTAACTATTTATATTATCCTAACTACTACCGCATTCTACTACTCAACTTAACTCCAGCACCAGACCTACTACTATCTCGCACCTGAAACAGCTAACATGACT H05189 ALU I [ ]

.....C.....  
 .....W.....  
 .....T.....G.....T.....  
 .....T.....T.....T.....

B

L16209 CCCCATGCTTACAAGCAAGTACAGCAATCAACCTCAACTATCACACATCAACTGCAACTCCTAAAGCCACCCTCACCCTACTAGGATACCAACAACTACCACCCTTAACAGTACATAGTACATAAAGCCA H16303 223 298

.....T.....G.....C.....  
 .....T.....G.....T.....C.....  
 .....T.....S.B.Y.....C.....  
 .....T.....B.....C.....  
 .....T.....B.....B.....C.....  
 .....T.....T.....G.....C.....  
 .....T.....C.....C.....  
 .....T.....G.....C.....

16287 CACTAGGATACCAACAACTACCACCCTAACAGTACATAGTACATAAAGCCATTTACCGTACATAGCACATTACAGTCAATCCCTTCTCGTCCCATGGATGACCCCTCAGATAGGGGTCCCTTG H16379 325 327

.....C.....C.....T.....  
 .....C.....C.....T.....  
 .....C.....C.....T.....  
 .....T.....C.....C.....T.....  
 .....C.....C.....T.....  
 .....T.....T.....C.....T.....  
 .....T.....T.....C.....T.....  
 .....T.....T.....C.....T.....

Oxford direct | .....C.....C.....T.....  
 | .....C.....G.....T.....C.....T.....  
 | .....C.....C.....T.....C.....T.....

Oxford clones ---- | .....C.....C.....T.....  
 | .....C.....C.....T.....  
 | .....C.....C.....T.....  
 | .....C.....C.....T.....  
 | .....C.....G.....A.....G.....GC.TG.....G.....T.....  
 | .....C.....C.....T.....T.....

C

L02828 AACAGAAATCCTCCGAGCGATTAAAGACTAGACCAACAGTCAAACCAACCATCGCTTATTGATCCAAAACTTGATCAACGGAACA H02922 - Ovis 16S

.....  
 .....  
 .....  
 CAGAACCAACCTCCGAGCAGTACATGCTAAGACTTACCAGTCAAAGCGAACTACTATACTCAATTGATCCAATAACTGACCAACGGAACA - Homo

.....  
 .....T.....A.....T.....  
 .....G.....G.....  
 .....M.....R.....  
 .....Y.....C.....

L01091 GCTTAGCCCTAAACACAATAATTATAAAAAAAAATTTATCGCCAGAGTACTACCGCAACAGCCGAAACTCAAAGGACTTGGCGGTGCTTTATACCCCTC H01195 - Ovis 12S

.....  
 .....  
 .....S.....  
 GCTTAGCCCTAAACCTCAACAGTTAAATCAACAAAATGCTCGCCAGAACACTACGAGCCACAGCTTAAACTCAAAGGACTTGGCGGTGCTTCATATCCCTC - Homo

.....  
 .....T.....
